# Supplementary material for: Prognostic Value of the Albumin-Adjusted Anion Gap for Short-Term Mortality in Pulmonary Embolism: A Retrospective Analysis Using the MIMIC-IV Database
Source: Research Square preprint supplement (doi:10.21203/rs.3.rs-6691446/v1), 2025-07-18
Supplement: Supplementary file 1 [file 2caf957b20b4ecba57b0e393.docx]

'Z86711','I269','I260','I2601','I2782','41519','I2690','I26','I2693','41512','V1255','67381','I2694','67384','67380','4162','I2609','41511','67382','I2699','67383'
